# Supplementary material
Source: ML conference proceedings conference paper supplement (https://proceedings.mlr.press/v95/chin18a.html)
Supplement: Supplementary file [file chin18a-supp.pdf]

# An Empirical Evaluation of Sketched SVD and its Application to Leverage Score Ordering: Supplementary Material

**Author Name1**

ABC@SAMPLE.COM

*Address 1*

**Author Name2**

XYZ@SAMPLE.COM

*Address 2*

## 1. Model Configurations

Here we provide more details on the model configurations used to ensure reproducibility of results.

### 1.1. Models for MNIST dataset

For the MNIST dataset, we implement the following models:

**LR** is a Logistic Regression classifier (Collins et al., 2002). **NN Small** is a small non-linear neural network (Haykin, 1998) with a hidden layer of 784 units with ReLU activation. **NN Large** is a large non-linear neural network (Haykin, 1998) with 3 hidden layers of 784, 128 and 64 units each with ReLU activation. **CNN Small** is a small convolutional neural network (Krizhevsky et al., 2012) with 1 convolution layer, 1 max pooling layer, 1 hidden layers of 128 units with ReLU activation. **CNN Large** is a large convolutional neural network (Krizhevsky et al., 2012) with 2 convolution layers, 2 max pooling layers, 2 hidden layers of 128 and 50 units each with ReLU activation.

### 1.2. Models for SST dataset

For the SST dataset, we use GloVe 300 dimensional word embeddings (Pennington et al., 2014) to convert words into vectors. A sequence length of 56 is selected and shorter sequence are zero-padded on the left. Longer sequences are truncated. We implement the following models:

**LR** is a Logistic Regression classifier (Collins et al., 2002). **DAN Small** is a small non-linear deep averaging network (Iyyer et al., 2015) that performs averaging of temporal features followed by a hidden layer of 64 units with 0.5 dropout and with ReLU activation. **DAN Large** is a small non-linear deep averaging network (Iyyer et al., 2015) that performs averaging of temporal features followed by 3 hidden layers of 128, 64 and 32 units each with 0.5 dropout and ReLU activation. **LSTM Small** is a small Long Short Term Memory network (Hochreiter and Schmidhuber, 1997) with 128 units followed by a hidden layer of 32 units with 0.5 dropout and ReLU activation. **LSTM Large** is a large 2 layer Stacked Bidirectional Long Short Term Memory network (Graves et al., 2013; Schuster and Paliwal,

1997) with 128 units followed by 2 hidden layers of 64 and 32 units each with 0.5 dropout and ReLU activation.

## References

- Michael Collins, Robert E. Schapire, and Yoram Singer. Logistic regression, adaboost and bregman distances. *Mach. Learn.*, 48(1-3):253–285, September 2002. ISSN 0885-6125. doi: 10.1023/A:1013912006537. URL <https://doi.org/10.1023/A:1013912006537>.
- A. Graves, A. r. Mohamed, and G. Hinton. Speech recognition with deep recurrent neural networks. In *2013 IEEE International Conference on Acoustics, Speech and Signal Processing*, pages 6645–6649, May 2013. doi: 10.1109/ICASSP.2013.6638947.
- Simon Haykin. *Neural Networks: A Comprehensive Foundation*. Prentice Hall PTR, Upper Saddle River, NJ, USA, 2nd edition, 1998. ISBN 0132733501.
- Sepp Hochreiter and Jürgen Schmidhuber. Long short-term memory. *Neural Comput.*, 9(8):1735–1780, November 1997. ISSN 0899-7667. doi: 10.1162/neco.1997.9.8.1735. URL <http://dx.doi.org/10.1162/neco.1997.9.8.1735>.
- Mohit Iyyer, Varun Manjunatha, Jordan L Boyd-Graber, and Hal Daumé III. Deep unordered composition rivals syntactic methods for text classification. In *ACL (1)*, pages 1681–1691, 2015.
- Alex Krizhevsky, Ilya Sutskever, and Geoffrey E Hinton. Imagenet classification with deep convolutional neural networks. In F. Pereira, C. J. C. Burges, L. Bottou, and K. Q. Weinberger, editors, *Advances in Neural Information Processing Systems 25*, pages 1097–1105. Curran Associates, Inc., 2012. URL <http://papers.nips.cc/paper/4824-imagenet-classification-with-deep-convolutional-neural-networks.pdf>.
- Jeffrey Pennington, Richard Socher, and Christopher D Manning. Glove: Global vectors for word representation. In *EMNLP*, volume 14, pages 1532–1543, 2014.
- M. Schuster and K.K. Paliwal. Bidirectional recurrent neural networks. *Trans. Sig. Proc.*, 45(11):2673–2681, November 1997. ISSN 1053-587X. doi: 10.1109/78.650093. URL <http://dx.doi.org/10.1109/78.650093>.
